# Supplementary material
Source: publisher site journal article supplement (https://static.cambridge.org/content/id/urn:cambridge.org:id:article:S1443964620000121/resource/name/S1443964620000121supp001.docx)
Supplement: Supplementary file 1 [file S1443964620000121supp001.docx]

Table 3: Example of development of descriptive codes and final theme

| Extracted units of data | Indexing for descriptive code | Constructing a code category | Theme |
| --- | --- | --- | --- |
| *I felt they probably could have pushed me a little bit more in certain areas. I think they were pretty nervous about me taking on too much* | Could have pushed me more | Less therapy for perceived needs | Pacing access and personal needs |
| *If there was going to be any criticism it would be frequency. They could do more. You can never have enough therapy, right* | They could do more | Less therapy for perceived needs |
| *I feel that I might be ready to go through some more physio type, at the moment, just because I’ve moved from the walker to the stick and I, kind of, want to know where I go from the stick from no stick…I’m probably ready at the moment for some more physio or just someone to keep an eye on it to tell me how do I progress from a stick to no stick* | I feel ready to go through more therapy | Ready for more therapy |
| *It worked pretty well for me because, like I didn’t, I didn’t have too many issues, I felt, in terms of, like, the physio side of things was fine. And I just needed time I guess to like fully recover and to get back into the swing of work* | Just needed time to recover | Good match with perceived needs |
| *Mostly it was alright…The two girls who stuck with me quite a lot were both quite good. One was doing OT and one was doing speech…I’ve got activities that you do at home, and so homework, take it back. But yeah, that was quite good, but then it thinned out sort of sooner than I expected* | Mostly it was alright  Then it thinned out sooner than expected | Unexpected change for perceived needs |
